RESEARCH ARTICLE

# The Modified painDETECT Questionnaire for Patients with Hip or Knee Osteoarthritis: Translation into Dutch, Cross-Cultural Adaptation and Reliability Assessment

Wietske Rienstra<sup>1\*</sup>, Tim Blikman<sup>1</sup>, Frans B. Mensink<sup>1</sup>, Jos J. A. M. van Raay<sup>2</sup>, Baukje Dijkstra<sup>3</sup>, Sjoerd K. Bulstra<sup>1</sup>, Martin Stevens<sup>1</sup>, Inge van den Akker-Scheek<sup>1</sup>

**1** Department of Orthopedics, University Medical Center Groningen, Groningen, The Netherlands, **2** Department of Orthopedics, Martini Hospital Groningen, Groningen, The Netherlands, **3** Department of Orthopedics, Medical Center Leeuwarden, Leeuwarden, The Netherlands

\* [w.rienstra@umcg.nl](mailto:w.rienstra@umcg.nl)

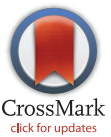

**OPEN ACCESS**

**Citation:** Rienstra W, Blikman T, Mensink FB, van Raay JJAM, Dijkstra B, Bulstra SK, et al. (2015) The Modified painDETECT Questionnaire for Patients with Hip or Knee Osteoarthritis: Translation into Dutch, Cross-Cultural Adaptation and Reliability Assessment. *PLoS ONE* 10(12): e0146117. doi:10.1371/journal.pone.0146117

**Editor:** Masahiko Sumitani, The University of Tokyo Hospital, JAPAN

**Received:** September 21, 2015

**Accepted:** December 14, 2015

**Published:** December 31, 2015

**Copyright:** © 2015 Rienstra et al. This is an open access article distributed under the terms of the [Creative Commons Attribution License](https://creativecommons.org/licenses/by/4.0/), which permits unrestricted use, distribution, and reproduction in any medium, provided the original author and source are credited.

**Data Availability Statement:** All relevant data are within the paper and its Supporting Information files.

**Funding:** This study was funded by the Dutch Arthritis Foundation (Reumafonds NL) ([www.reumafonds.nl](http://www.reumafonds.nl)). The funders had no role in study design, data collection and analysis, decision to publish, or preparation of the manuscript.

**Competing Interests:** The authors have declared that no competing interests exist.

## Abstract

There is a growing amount of evidence that alteration in pain processing by the peripheral and central nervous system play a role in osteoarthritis pain, leading to neuropathic-like symptoms. It is essential to identify knee and hip osteoarthritis patients with a neuropathic pain profile in order to offer such patients education and additional treatment options besides conventional pain treatment. The painDETECT Questionnaire is a self-report questionnaire developed to discriminate between nociceptive and neuropathic pain. This questionnaire was modified to fit patients suffering from knee osteoarthritis. The aim of this study was to translate and cross-culturally adapt the modified painDETECT Questionnaire to the Dutch language and to provide a modified version to fit patients with hip osteoarthritis. Reliability for internal consistency, repeatability and floor and ceiling effects were subsequently assessed. A total of 278 patients were included in the reliability study and 123 patients in the repeatability analysis. The Dutch modified painDETECT Questionnaire shows good internal consistency and small relative measurement errors, represented by a good intra-class correlation coefficient. Absolute measurement error, represented by the Standard Error of Measurement, was acceptable. However, a measurement bias might be present when it comes to repeatability. To our knowledge, this study is the first to provide a Dutch modified painDETECT Questionnaire to fit hip and knee osteoarthritis patients and to assess internal consistency, reliability and agreement. International guidelines were followed in the translation process and this study has ample sample size with an adequate time interval for repeatability. Based on this study, the Dutch modified painDETECT Questionnaire seems to be fit as a discriminative tool to identify knee and hip osteoarthritis patients with a neuropathic pain profile. Whether it is also suitable as an evaluative tool to record changes over time or after an intervention remains open to further investigation.

## Introduction

Osteoarthritis (OA) is the most common arthritic joint disease, affecting mainly older adults [1–3]. Its worldwide symptomatic and economic burden is tremendous [1,3]. Due to increasing age of the population the burden of OA will likely become even greater in the future [3–6]. Mostly joints of the lower extremity are affected, especially the hip and knee, leading to pain and disability [1].

For most patients with OA, pain is the main reason to seek medical consultation and treatment. Over time the pain often transforms from intermittent weight-bearing to persistent, chronic pain [3,7]. The etiology of pain in OA is complex and its exact pathophysiology is still not completely clarified. A broad spectrum of mechanisms is believed to be involved, both nociceptive and neuropathic [8–10]. There is a growing amount of evidence that alteration in pain processing by the peripheral and central nervous system play a role in OA pain leading to sensitization [8–14]. Sensitization of the nervous system may lead to neuropathic-like symptoms such as allodynia, hyperalgesia and hypoesthesia [15]. Up to 19% of patients suffering from hip OA and 19–37% of patients suffering from knee OA experience possible or likely neuropathic pain localized in or around their hip or knee [15–20].

It is essential to identify knee and hip OA patients with a neuropathic pain profile in order to offer such patients education and additional treatment options besides conventional pain treatment. A reliable and valid tool for assessing neuropathic pain symptoms in OA patients is therefore of great importance. Besides diagnosis by a specialized pain physician, there are several tools to assess neuropathic pain symptoms, ranging from self-report questionnaires to a more objective tool like Quantitative Sensory Testing (QST) [21–24]. For evaluation in a non-clinical, ambulatory setting only self-report questionnaires seem feasible, as the more objective methods are time-consuming, elaborate, require trained examiners, and are therefore only applicable in a clinical setting.

The painDETECT Questionnaire (PDQ) is a self-report questionnaire that has been developed to discriminate between nociceptive and neuropathic pain. Originally it was developed for patients with chronic low back pain [25]. With a sensitivity and specificity of 85% and 80% respectively, accuracy of the PDQ is comparable to other self-report questionnaires [24,26]. Hochman et al. modified this questionnaire to fit patients suffering from knee OA. This modified painDETECT questionnaire (mPDQ) has improved upon the PDQ in content validity, face validity and feasibility for the knee OA population [18].

No Dutch-language version of the mPDQ is currently available. It should be noted that the mPDQ only considers knee OA, it is not modified to fit patients suffering from hip OA. Hence the aims of this study were: 1) to translate and cross-culturally adapt the mPDQ to the Dutch language, 2) to adjust the Dutch mPDQ to fit patients with hip OA, and 3) to assess the reliability of the Dutch mPDQ.

## Methods

This study consists of two stages. First, translation and cross-cultural adaptation of the mPDQ took place. In this stage the mPDQ was also adapted to fit patients suffering from hip OA. Secondly, internal consistency, repeatability and floor-ceiling effects were evaluated. The study was approved by the Medical Ethical Committee of University Medical Center Groningen (no. METc2014/087). Informed consent was considered obtained if the patient granted our request to participate in the study by returning a set of completed questionnaires. If patients did not want to participate in the study they were requested to return the blank set of questionnaires. Patients were informed of this way of obtaining consent by an information letter. In this information letter they were also informed of the voluntary nature of the study, and that all data was

processed anonymously. The Medical Ethical Committee specifically approved this consent procedure.

## Translation and cross-cultural adaptation

The international guidelines proposed by Beaton et al. were followed during translation and cross-cultural adaptation of the mPDQ into Dutch [27]. Forward translation of the English mPDQ into Dutch was done independently by two bilingual native Dutch speakers, one with a medical background and the other a layman. Discrepancies between the two forward-translated versions of the mPDQ were subsequently identified and resolved during a consensus meeting with an expert as referee. This synthesis process was documented in a written report. Next, backward translation of the Dutch consensus version of the mPDQ into English was done independently by two bilingual native English speakers, again one with a medical background and the other a layman. These two translators had never seen the original version of the mPDQ and were neither informed nor familiar with the concept of the study. In this way, the content validity was verified. All versions were reviewed during a final consensus meeting of the two native Dutch-speaking translators and the expert. Consensus was obtained and a pre-final version of the Dutch mPDQ (mPDQ-NL) was composed. Finally, the mPDQ-NL was slightly adjusted to fit patients suffering from hip OA. The two questionnaires are identical except for substituting the target joint “knee” for “hip” in every question.

After this translation and adaptation process, comprehensibility of the pre-final mPDQ-NL was tested in a pilot study. Thirty patients suffering from knee or hip OA who had an appointment at the outpatient clinic of the Department of Orthopedic Surgery of University Medical Center Groningen were asked to complete the questionnaire. These patients were asked to report any problems filling out the questionnaire and to give their comments. This resulted in a few minor adaptations to the questionnaire like underscoring some items to enhance interpretability. See [S1 Text](#) for the final mPDQ-NL hip and knee.

## Reliability

**Participants.** Patients suffering from idiopathic hip or knee OA who were receiving conservative treatment or were on the waiting list for Total Hip or Knee Arthroplasty (THA/TKA) were eligible to participate. A random sample of 604 patients who had visited the outpatient clinic between July 2013 and May 2014 was obtained from the Departments of Orthopedic Surgery of University Medical Center Groningen, Martini Hospital Groningen and Medical Center Leeuwarden (all in the Netherlands). Exclusion criteria were: age below 18 years; hip or knee surgery in the past six months; severe neurological, cognitive or psychiatric disorders; and inadequate understanding of written Dutch.

**Procedure.** Eligible patients received an information letter, the mPDQ-NL hip or knee, a questionnaire on demographic characteristics and comorbidities, and a pre-paid reply envelope by mail. Patients were requested to complete the questionnaires. It was explained in the information letter that returning a set of completed questionnaires was considered as informed consent to participate in the study. If patients suffered from OA in more than one joint they were asked to complete the questionnaire for the hip or knee joint that was most symptomatic. To assess repeatability, a second mPDQ-NL was sent to participants after an interval of two weeks. The second mailing included an anchor question on the global rating of change, in which patients could indicate if their symptoms had changed over the last two weeks. Only patients who reported that their symptoms had not changed were included in the repeatability analysis. If returned questionnaires were incomplete, several attempts were made to reach patients by telephone in order to complete the missing items. Data collection took place from April to June 2014.

## mPDQ-NL

The mPDQ-NL is a self-report questionnaire consisting of 12 items about neuropathic pain symptoms of the left or right knee or hip during the past week. The first item assesses the presence of pain radiation using a body map. The second item assesses the pain pattern, where patients have to choose between four figures representing distinctly described pain patterns. The following seven items rank pain quality on a 6-point Likert scale, 1 representing “never” and 5 representing “very strongly”. These items respectively assess *burning sensation, tingling or prickling sensation, pain at light touch, sudden pain attacks, pain at cold or warm stimulus, numbness* and *pain at light pressure*. The final three items rank pain intensity on a 0–10 numeric rating scale (NRS), where 0 represents “no pain” and 10 represents “excruciating pain”. These final three items are about “pain at this moment”, “worst pain in the past week” and “average pain in the past week”, respectively. The total score ranges from -1 to 38 points; the final three items on pain intensity are not included in the score. Cut-off points were chosen in accordance with the original PDQ [25]. A score  $\leq 12$  indicates a nociceptive pain profile and a score between 13–18 indicates a possible neuropathic pain profile. A score  $\geq 19$  indicates a likely neuropathic pain profile.

## Statistical Analysis

Statistical analyses were performed using IBM SPSS Statistics for Windows (version 22.0, IBM Corp., Armonk, NY). Statistical significance was considered to be indicated with a  $p$ -value  $< 0.05$  (two-tailed). If patients reported no pain on all three NRS of the mPDQ-NL, they were excluded from the analyses. Patient characteristics were reported using descriptive statistics.

**Internal consistency.** Internal consistency reflects the extent to which items of a questionnaire measure the same concept. Factor analysis should first be conducted to determine whether the items of the questionnaire form one single overall dimension or more than one [28]. Exploratory factor analysis was conducted according to Kaiser’s criterion using varimax rotation. Cronbach’s alphas were subsequently calculated for each principal component that was found. Cronbach’s alphas were also calculated for the overall questionnaire and for the seven Likert items on pain quality, analogously to earlier studies [25,29,30]. A Cronbach’s alpha of 0.70–0.95 is generally accepted as a measure of good internal consistency [28].

**Repeatability.** Repeatability concerns whether repeated measures in a stable person provide the same scores. Two parts are distinguished: agreement (represented by the absolute measurement error) and reliability (represented by the relative measurement error) [28,31].

Agreement reflects the extent to which the scores of repeated measures are close to each other [28]. Absolute measurement errors were determined by calculating the standard error of measurement (SEM). The SEM can be derived by dividing the standard deviation of the mean differences ( $SD_{diff}$ ) between baseline measurement and retest measurement by  $\sqrt{2}$  [31]. The smallest “real” change that can be detected in scores, despite measurement error, is represented by the smallest detectable change (SDC). This SDC with a 95% confidence interval (CI) for an individual can be derived from the SEM by using the following formula:  $SDC_{ind} = 1.96 \times SEM \times \sqrt{2}$ . For a group the SDC with 95% CI can be calculated by using the following formula:  $SDC_{group} = 1.96 \times SEM \times \sqrt{2} / \sqrt{n}$ . Absolute agreement was assessed using the methods of Bland and Altman [32]. The mean difference was calculated between test and retest with a 95% CI. When zero lies inside this 95% CI of mean difference, agreement is considered to be achieved. Otherwise, when zero lies outside the 95% CI, bias between test and retest measurements might be present.

Reliability reflects the extent to which patients can be distinguished from each other, despite measurement errors [28]. Relative measurement errors were assessed using intraclass correlation coefficients (ICC) with a 95% CI. A two-way random effects model (type absolute agreement) was used. In general, an ICC above 0.70 is considered good [33].

**Floor and ceiling effects.** The percentages of patients with the highest and lowest possible scores on the total mPDQ-NL and on the individual pain quality items were calculated. If more than 15% of respondents have minimal or maximal scores, floor and ceiling effects are considered to be present [28]. This reduces reliability as participants with extreme scores cannot be distinguished from each other.

## Results

Translation of the mPDQ into Dutch was successful. No difficulties were encountered during pilot testing. In total, 604 patients were invited to participate in the reliability study. The response rate was 336 participants (55.6%). Of these respondents, 278 (46.0%) were included in the reliability study. Ten patients were excluded from the repeatability analysis. Reasons were because they received THA/TKA before the retest could be conducted or because the first questionnaire was returned with a considerable delay that surpassed the retest period. The response rate for the repeatability analysis was 220 participants (82.1%), 123 (45.9%) of whom were included in the repeatability analysis. Fig 1 shows the flow chart for inclusion. The number of cases lost because of missing items was 34 out of 336 respondents of the first questionnaire (10.1%) and 15 out of 220 respondents of the second questionnaire (6.8%).

Table 1 presents patient characteristics and mPDQ-NL scores for the study sample, with 17.7% of knee OA patients and 12.2% of hip OA patients showing a likely neuropathic pain profile (mPDQ-NL score  $\geq 19$ ), and 26.7% of knee OA patients and 23.7% of hip OA patients showing a possible neuropathic pain profile (mPDQ-NL score 13–18).

## Clinimetric properties

**Internal consistency.** Exploratory factor analysis revealed two principal components with an eigenvalue  $\geq 1$ . The first component had a Cronbach's alpha of 0.71, the second component 0.65. The general questionnaire showed a Cronbach's alpha of 0.77 and the seven Likert items on pain quality 0.80.

**Repeatability.** Table 2 presents repeatability results for the mPDQ-NL. For total scores the SEM was 2.6, the  $SDC_{ind}$  7.3 and the  $SDC_{group}$  0.7. For individual items, SEM value ranges were 0.5–0.9,  $SDC_{ind}$  ranges 1.1–2.6 and  $SDC_{group}$  0.1–0.3. For the total score, the mean difference between test and retest was 0.69 with a 95% CI of 0.03–1.36, which therefore did not contain zero. For individual items, the 95% CI contained zero for most individual items, except for *radiation* and *sudden pain attacks*. The Bland Altman plot is presented in Fig 2. For the total score, ICC was 0.90. For individual items ICC was high for most pain quality items ( $>0.70$ ), except for *pain pattern* (ICC 0.52) and *radiation* (ICC 0.67).

**Floor and ceiling effects.** For the total mPDQ-NL score, no floor or ceiling effects were found as no patient had the highest or lowest possible total score (-1 or 38 points). For all individual Likert items,  $>15\%$  of patients had the lowest score, indicating that floor effects were present; no ceiling effects were perceived (Table 3).

## Discussion

This study is the first to provide a Dutch mPDQ to fit hip and knee OA patients, as well as to assess internal consistency, reliability and agreement of the mPDQ hip and knee. Hence results

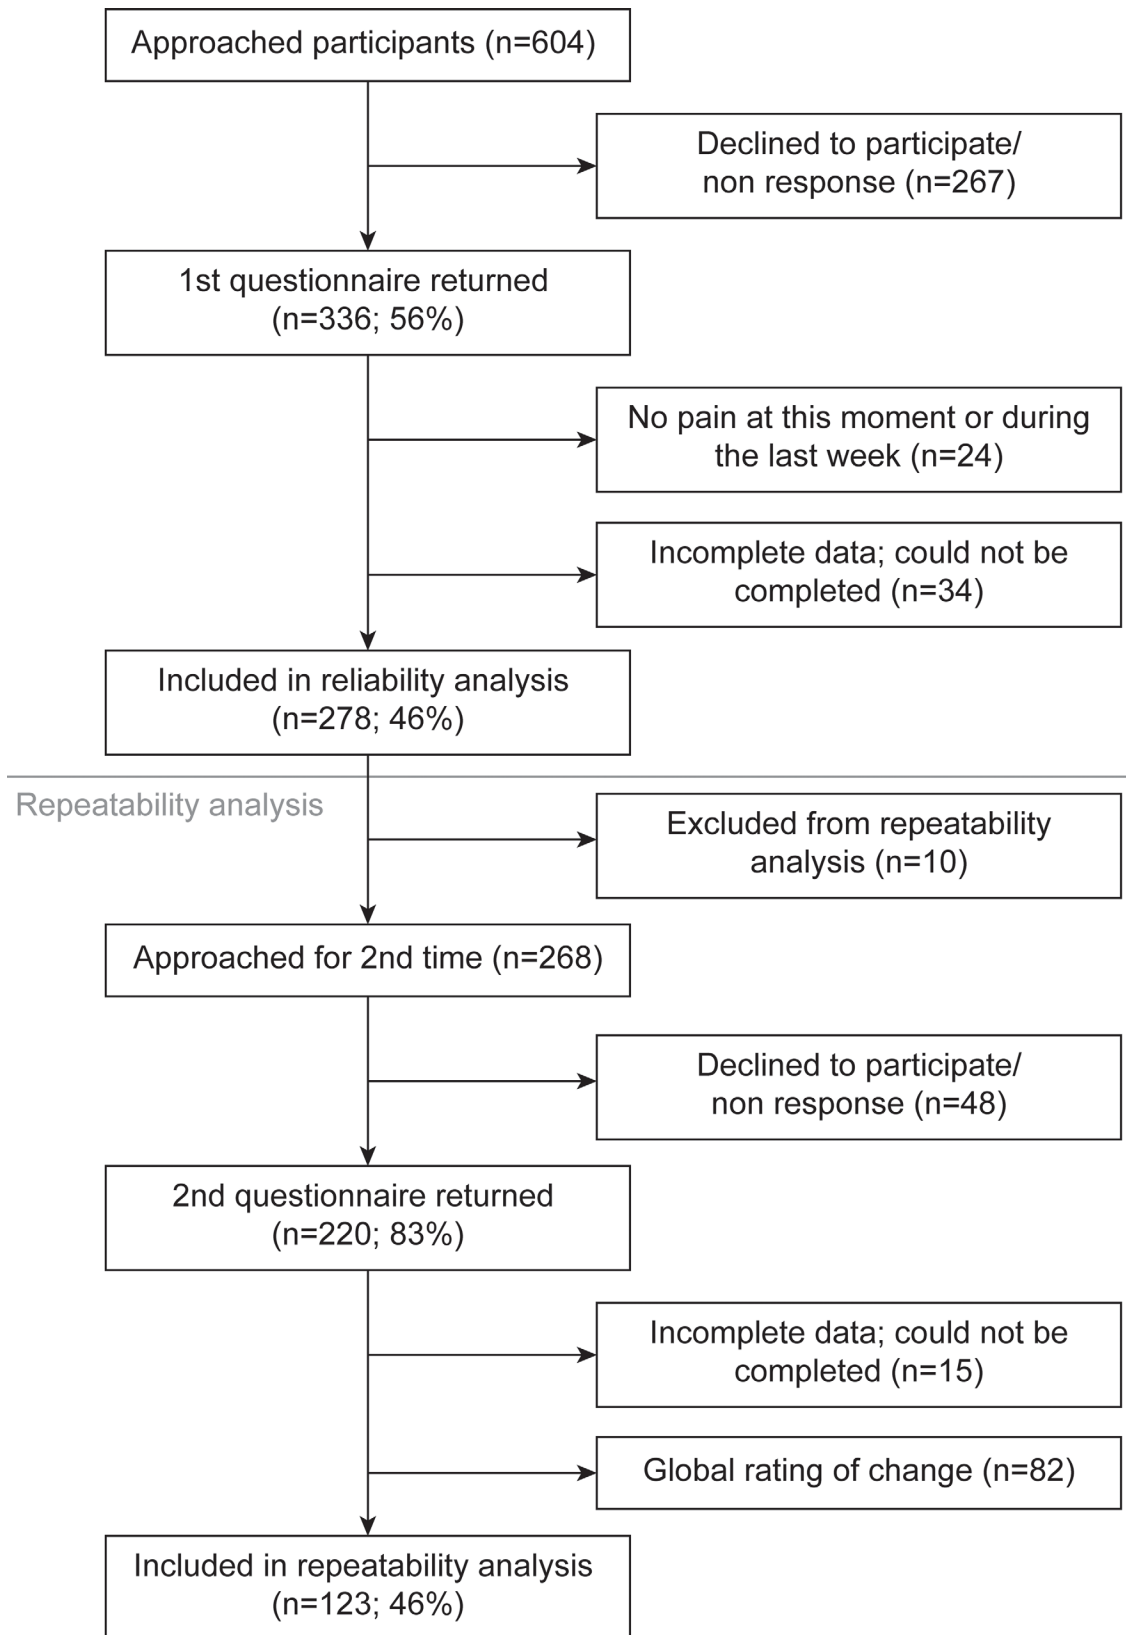

**Fig 1. Flow chart showing inclusion procedure.**

doi:10.1371/journal.pone.0146117.g001

**Table 1. Patient Characteristics.**

|                                      |        |                 |
|--------------------------------------|--------|-----------------|
| Age (years)                          |        | 65 ± 10 (37–90) |
| Gender                               | Female | 162 (58.3%)     |
|                                      | Male   | 116 (41.7%)     |
| Body Mass Index (kg/m <sup>2</sup> ) |        | 28 ± 5 (18–45)  |
| Duration of pain (months) *          |        | 36 (18–78)      |
| mPDQ-NL*                             |        | 10 (7–16)       |

Abbreviations: mPDQ-NL, Dutch modified Pain DETECT Questionnaire. Mean ± SD (min-max) are shown for variables with normal distribution.

\* Median (IQ range) is shown for variables with abnormal distribution. Gender is shown as number of patients (%).

doi:10.1371/journal.pone.0146117.t001

from the present study can only be compared to reliability data of the PDQ, as no other studies on reliability of the mPDQ are available to our knowledge.

For internal consistency, Crohnbach’s alpha for the overall score was 0.77, which is considered good [28]. This score is comparable to the Japanese, Turkish and Spanish PDQs, where overall Crohnbach’s alphas of respectively 0.78, 0.81 and 0.86 were found. No Crohnbach’s alpha from the original PDQ was available for comparison. For the seven Likert items on pain quality, Crohnbach’s alpha was 0.80, which is comparable to the original, Japanese, Turkish and Spanish PDQs with values of respectively 0.83, 0.80, 0.80 and 0.89 [25,29,30,34]. To summarize, overall internal consistency of the mPDQ-NL knee and hip is good and internal consistency between the seven Likert items on pain quality is particularly good.

Repeatability was assessed in terms of agreement and reliability. For agreement, SEM seems acceptable with 2.6 points, as the mPDQ ranges from -1 to 38 points. The mPDQ-NL might be better at detecting changes between groups of patients than at the individual level, considering that the individual SDC in the overall score was 7.3 points and the SDC at the group level was 0.7 points. However, to properly assess the value of these SDC figures they should be compared to the minimal important change (MIC), which could not be determined from the current data.

When assessing agreement according to Bland and Altman, it should be mentioned that the 95% CI did not contain zero for the overall mPDQ-NL score, although it almost reached zero (0.03–1.36). This means that a systematic measurement bias between the test and retest might be present. Even though only subjects who reported that their pain had not changed over the last two weeks were included in the analysis, the overall mPDQ-NL values were consistently slightly lower at retest. Patients may have had some difficulty estimating the global rate of change of the pain they experienced in the previous two weeks. The Bland and Altman plot shows an equal scatter of the difference in mPDQ-NL though, which means that no actual trend can be observed (Fig 2).

Reliability of the mPDQ-NL was good (ICC: 0.90), so it seems able to distinguish patients from each other despite measurement error. This is in line with previous PDQ reliability studies. For the Japanese PDQ an overall ICC of 0.94 was found, but only 11 subjects were included in their repeatability analysis. For the Spanish PDQ a repeatability analysis was conducted on 26 patients and an overall ICC of 0.93 was found.

No significant floor or ceiling effects were encountered for total mPDQ-NL scores. However, floor effects were found for all the individual Likert items. As only a subset of knee and hip OA patients experience neuropathic pain symptoms, it is understandable that floor effects were found. Considering that these floor effects for individual Likert items were not represented in the overall mPDQ-NL scores, it is likely that patients with subtle neuropathic

**Table 2. Repeatability.**

|                                         | Baseline mean ± SD | Retest mean ± SD | Mean difference (95% CI) | SEM | SDC <sub>ind</sub> | SDC <sub>grp</sub> | ICC (95% CI)     |
|-----------------------------------------|--------------------|------------------|--------------------------|-----|--------------------|--------------------|------------------|
| Total score (n = 123)*                  | 10.9 ± 6.5         | 10.5 ± 6.1       | 0.69 (1.36; 0.03)        | 2.6 | 7.3                | 0.7                | 0.90 (0.86–0.93) |
| Radiation (n = 129)*                    | 1.4 ± 0.9          | 1.2 ± 1.0        | 0.28 (0.44; 0.12)        | 0.7 | 1.8                | 0.2                | 0.67 (0.53–0.77) |
| Pain pattern (n = 131)*                 | 0.3 ± 0.7          | 0.3 ± 0.7        | -0.01 (0.13; -0.15)      | 0.6 | 1.6                | 0.1                | 0.52 (0.32–0.66) |
| Burning sensation (n = 132)*            | 1.3 ± 1.5          | 1.3 ± 1.3        | 0.01 (0.22; -0.20)       | 0.9 | 2.4                | 0.3                | 0.76 (0.66–0.83) |
| Tingling/prickling sensation (n = 130)* | 1.2 ± 1.5          | 1.4 ± 1.3        | -0.19 (0.01; -0.40)      | 0.8 | 2.3                | 0.2                | 0.77 (0.68–0.84) |
| Pain at light touching (n = 131)*       | 0.9 ± 1.2          | 0.8 ± 1.0        | 0.12 (0.29; -0.04)       | 0.7 | 1.9                | 0.2                | 0.77 (0.67–0.84) |
| Sudden pain attacks/electric (n = 131)* | 2.3 ± 1.6          | 2.1 ± 1.4        | 0.26 (0.49; 0.03)        | 0.9 | 2.6                | 0.2                | 0.75 (0.65–0.83) |
| Pain at cold/heat (n = 129)*            | 0.6 ± 1.0          | 0.6 ± 1.0        | -0.03 (0.09; -0.16)      | 0.5 | 1.1                | 0.1                | 0.86 (0.80–0.90) |
| Numbness sensation (n = 130)*           | 1.1 ± 1.3          | 1.2 ± 1.3        | -0.05 (0.15; -0.26)      | 0.9 | 2.4                | 0.2                | 0.74 (0.63–0.81) |
| Pain at slight pressure (n = 132)*      | 1.9 ± 1.5          | 1.8 ± 1.3        | 0.15 (0.33; -0.03)       | 0.8 | 2.1                | 0.2                | 0.84 (0.77–0.89) |

Abbreviations: SD, standard deviation; CI, confidence interval; SEM, standard error of measurement; SDC<sub>ind</sub>, smallest detectable change at the individual level; SDC<sub>grp</sub>, smallest detectable change at the group level; ICC, intraclass correlation coefficient. Mean difference = baseline mean–retest mean.

\* 123 complete cases were included in the repeatability analysis, yet for individual items there were fewer missing cases.

doi:10.1371/journal.pone.0146117.t002

symptoms can be distinguished from each other. This is important for the mPDQ-NL in order to identify subtle neuropathic symptoms within the broader spectrum of OA symptoms.

Because the mPDQ-NL considers symptoms other than actual pain (such as *numbness*), it is possible for patients with a low NRS for general pain intensity to reach a considerable mPDQ-NL score. Therefore, if patients reported even the least amount of pain (NRS >0) they were included in the study in order to evaluate neuropathic pain for the total range of symptomatic OA patients. Even in this population sample consisting of patients with different degrees of OA pain, 35.9% of hip OA patients and 44.4% of knee OA patients suffer from possible or likely neuropathic pain. The magnitude of these figures might support current literature on the importance of sensitization in OA pain [3,7,8,11,13]. Identification of patients with neuropathic features could facilitate customizing their treatment, for example by offering neuro-modulating medication such as duloxetine. In the setting of future research, identifying subgroups of OA patients with neuropathic features could help assess the true effectiveness of these neuromodulating medications [10].

One of the strengths of the present study is that international guidelines were followed in the translation process. Furthermore, this study has ample sample size. When compared to other studies there is a relevant and recommended time interval between test and retest. Patients that reported a change in their pain over the two weeks between test and retest were excluded from the repeatability analysis [29,30,35]. The percentage of cases lost to analysis due to missing items was <15%, therefore selection bias is unlikely and the results can be considered generalizable to the missing part of the population [36]. To our knowledge, the present study is the first to clearly distinguish between reliability and agreement when assessing repeatability as recommended by COSMIN [28]. Although this study provides SEM and SDCs, which give some indication of evaluative purposes, future studies are needed to relate these values to the MIC and assess responsiveness. Validity of the mPDQ-NL also needs to be investigated in future studies on the construct and the factor structure of the mPDQ-NL.

## Conclusion

The mPDQ was successfully translated and adapted to fit Dutch hip and knee OA patients. It shows good internal consistency and small relative measurement errors, represented by a good



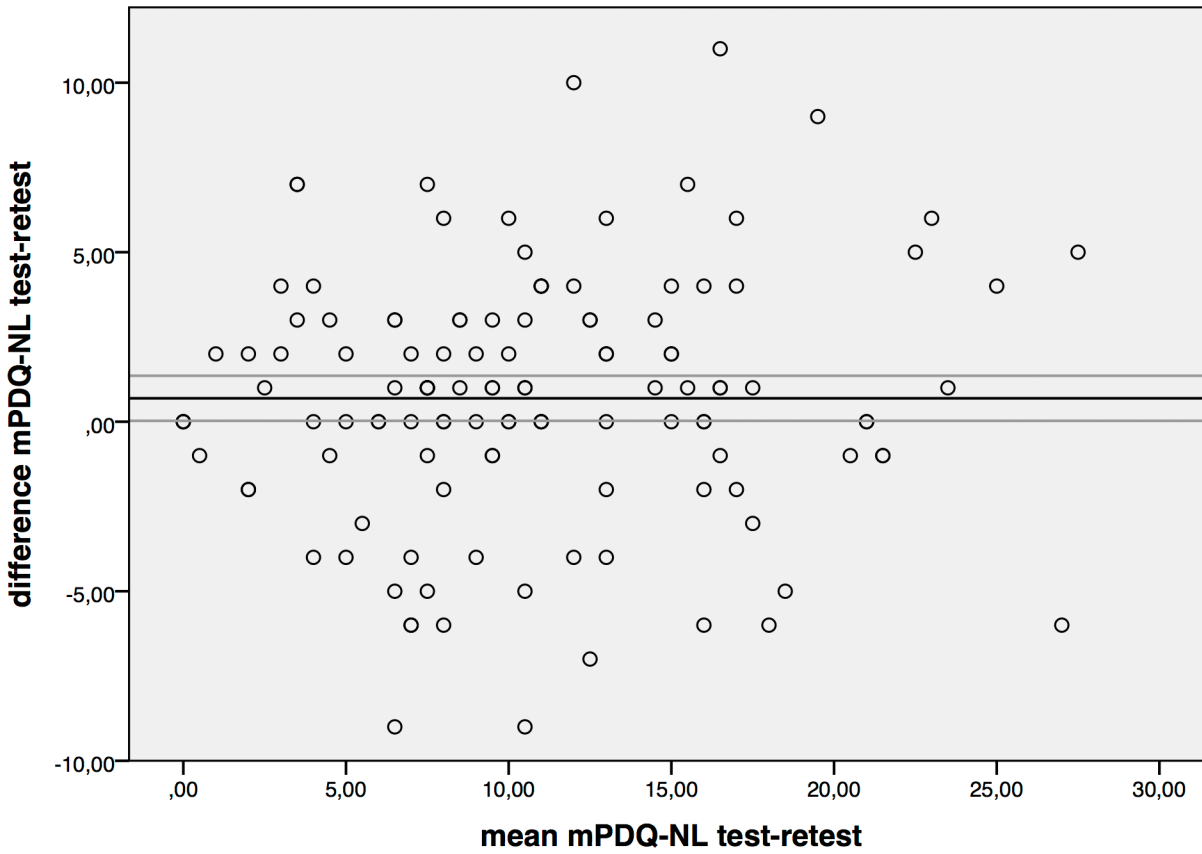

**Fig 2. Bland Altman plot with 95% confidence interval (CI).** Vertical axis: difference between mPDQ test and retest. Horizontal axis: mean mPDQ-NL when combining test and retest. The horizontal line represents the mean difference between test and retest. The gray lines represent the 95% CI of this mean difference. Notice that the 95% CI approaches 0.00.

doi:10.1371/journal.pone.0146117.g002

ICC. Absolute measurement error, represented by the SEM, was acceptable. However, a measurement bias might be present. Based on this study, the mPDQ-NL seems to be fit as a discriminative tool to identify knee and hip OA patients with a neuropathic pain profile. Whether it is also suitable as an evaluative tool to record changes over time or changes after an intervention remains to be investigated further. As OA is the most common joint disease with a great burden on healthcare worldwide, it is of the utmost importance to optimize its treatment

**Table 3. Floor and Ceiling effects.**

|   | Burning sensation | Tingling/prickling sensation | Pain at light touching | Sudden pain attacks/ electric | Pain at cold/ heat | Numbness    | Pain at slight pressure |
|---|-------------------|------------------------------|------------------------|-------------------------------|--------------------|-------------|-------------------------|
| 0 | 122 (43.9%)       | 124 (44.6%)                  | 145 (52.2%)            | 53 (19.1%)                    | 185 (66.5%)        | 130 (46.8%) | 67 (24.1%)              |
| 1 | 42 (15.1%)        | 49 (17.6%)                   | 55 (19.8%)             | 33 (11.9%)                    | 57 (20.5%)         | 50 (18.0%)  | 39 (14.0%)              |
| 2 | 35 (12.6%)        | 39 (14.0%)                   | 34 (12.2%)             | 49 (17.6%)                    | 14 (5.0%)          | 52 (18.7%)  | 57 (20.5%)              |
| 3 | 47 (16.9%)        | 35 (12.6%)                   | 31 (11.2%)             | 63 (22.7%)                    | 17 (6.1%)          | 27 (9.7%)   | 59 (21.2%)              |
| 4 | 26 (9.4%)         | 25 (9.0%)                    | 11 (4.0%)              | 57 (20.5%)                    | 3 (1.1%)           | 13 (4.7%)   | 49 (17.6%)              |
| 5 | 6 (2.2%)          | 6 (2.2%)                     | 2 (0.7%)               | 23 (8.3%)                     | 2 (0.7%)           | 6 (2.2%)    | 7 (2.5%)                |

Number of patients per item score (%). Total n = 278

doi:10.1371/journal.pone.0146117.t003

options. In order to do this, pain in OA patients needs to be clarified further. The mPDQ-NL hip and knee could facilitate in this quest by identifying knee and hip OA patients with a neuropathic pain profile.

## Supporting Information

### S1 Database.

(SAV)

### S1 Text. mPDQ-NL hip and knee.

(PDF)

## Acknowledgments

Special thanks to R. Kuilman for his contribution to the data collection. All authors are grateful to the patients who were willing to participate.

## Author Contributions

Conceived and designed the experiments: WR TB FBM SKB MS IAS. Performed the experiments: WR TB FBM. Analyzed the data: WR IAS. Contributed reagents/materials/analysis tools: BD JJAMR. Wrote the paper: WR TB FBM JJAMR BD SKB MS IAS.

## References

1. Centers for Disease Control and Prevention (CDC). Osteoarthritis. 2015; 05:21. Available: <http://www.cdc.gov/arthritis/basics/osteoarthritis.htm>.
2. Lawrence RC, Felson DT, Helmick CG, Arnold LM, Choi H, Deyo RA, et al. Estimates of the prevalence of arthritis and other rheumatic conditions in the United States. Part II. *Arthritis Rheum.* 2008; 58: 26–35. doi: [10.1002/art.23176](https://doi.org/10.1002/art.23176) PMID: [18163497](https://pubmed.ncbi.nlm.nih.gov/18163497/)
3. Neogi T. The epidemiology and impact of pain in osteoarthritis. *Osteoarthritis Cartilage.* 2013; 21: 1145–1153. doi: [10.1016/j.joca.2013.03.018](https://doi.org/10.1016/j.joca.2013.03.018) PMID: [23973124](https://pubmed.ncbi.nlm.nih.gov/23973124/)
4. Otten R, van Roermund PM, Picavet HS. Trends in the number of knee and hip arthroplasties: considerably more knee and hip prostheses due to osteoarthritis in 2030. *Ned Tijdschr Geneesk.* 2010; 154: A1534. PMID: [20619009](https://pubmed.ncbi.nlm.nih.gov/20619009/)
5. Kurtz S, Ong K, Lau E, Mowat F, Halpern M. Projections of primary and revision hip and knee arthroplasty in the United States from 2005 to 2030. *The Journal of Bone & Joint Surgery.* 2007; 89: 780–785.
6. Nguyen US, Zhang Y, Zhu Y, Niu J, Zhang B, Felson DT. Increasing prevalence of knee pain and symptomatic knee osteoarthritis: survey and cohort data. *Ann Intern Med.* 2011; 155: 725–732. doi: [10.7326/0003-4819-155-11-201112060-00004](https://doi.org/10.7326/0003-4819-155-11-201112060-00004) PMID: [22147711](https://pubmed.ncbi.nlm.nih.gov/22147711/)
7. Neogi T, Frey-Law L, Scholz J, Niu J, Arendt-Nielsen L, Woolf C, et al. Sensitivity and sensitisation in relation to pain severity in knee osteoarthritis: trait or state? *Ann Rheum Dis.* 2013.
8. Mease PJ, Hanna S, Frakes EP, Altman RD. Pain mechanisms in osteoarthritis: understanding the role of central pain and current approaches to its treatment. *J Rheumatol.* 2011; 38: 1546–1551. doi: [10.3899/jrheum.100759](https://doi.org/10.3899/jrheum.100759) PMID: [21632678](https://pubmed.ncbi.nlm.nih.gov/21632678/)
9. Woolf CJ. Central sensitization: implications for the diagnosis and treatment of pain. *Pain.* 2011; 152: S2–S15. doi: [10.1016/j.pain.2010.09.030](https://doi.org/10.1016/j.pain.2010.09.030) PMID: [20961685](https://pubmed.ncbi.nlm.nih.gov/20961685/)
10. Thakur M, Dickenson AH, Baron R. Osteoarthritis pain: nociceptive or neuropathic? *Nat Rev Rheumatol.* 2014; 10: 374–380. doi: [10.1038/nrrheum.2014.47](https://doi.org/10.1038/nrrheum.2014.47) PMID: [24686507](https://pubmed.ncbi.nlm.nih.gov/24686507/)
11. Gwilym SE, Keltner JR, Warnaby CE, Carr AJ, Chizh B, Chessell I, et al. Psychophysical and functional imaging evidence supporting the presence of central sensitization in a cohort of osteoarthritis patients. *Arthritis Care & Research.* 2009; 61: 1226–1234.
12. Lee YC, Nassikas NJ, Clauw DJ. The role of the central nervous system in the generation and maintenance of chronic pain in rheumatoid arthritis, osteoarthritis and fibromyalgia. *Arthritis Res Ther.* 2011; 13: 211. doi: [10.1186/ar3306](https://doi.org/10.1186/ar3306) PMID: [21542893](https://pubmed.ncbi.nlm.nih.gov/21542893/)

13. Murphy SL, Phillips K, Williams DA, Clauw DJ. The role of the central nervous system in osteoarthritis pain and implications for rehabilitation. *Curr Rheumatol Rep*. 2012; 14: 576–582. doi: [10.1007/s11926-012-0285-z](https://doi.org/10.1007/s11926-012-0285-z) PMID: [22879060](https://pubmed.ncbi.nlm.nih.gov/22879060/)
14. Staud R. Evidence for shared pain mechanisms in osteoarthritis, low back pain, and fibromyalgia. *Curr Rheumatol Rep*. 2011; 13: 513–520. doi: [10.1007/s11926-011-0206-6](https://doi.org/10.1007/s11926-011-0206-6) PMID: [21833699](https://pubmed.ncbi.nlm.nih.gov/21833699/)
15. Hochman J, Davis A, Elkayam J, Gagliese L, Hawker G. Neuropathic pain symptoms on the modified painDETECT correlate with signs of central sensitization in knee osteoarthritis. *Osteoarthritis and Cartilage*. 2013; 21: 1236–1242. doi: [10.1016/j.joca.2013.06.023](https://doi.org/10.1016/j.joca.2013.06.023) PMID: [23973136](https://pubmed.ncbi.nlm.nih.gov/23973136/)
16. Shigemura T, Ohtori S, Kishida S, Nakamura J, Takeshita M, Takazawa M, et al. Neuropathic pain in patients with osteoarthritis of hip joint. *European Orthopaedics and Traumatology*. 2011; 2: 73–77.
17. Valdes AM, Doherty SA, Zhang W, Muir KR, Maciewicz RA, Doherty M. Inverse relationship between preoperative radiographic severity and postoperative pain in patients with osteoarthritis who have undergone total joint arthroplasty. *Semin Arthritis Rheum*. 2012; 41: 568–575. doi: [10.1016/j.semarthrit.2011.07.002](https://doi.org/10.1016/j.semarthrit.2011.07.002) PMID: [21868060](https://pubmed.ncbi.nlm.nih.gov/21868060/)
18. Hochman J, Gagliese L, Davis A, Hawker G. Neuropathic pain symptoms in a community knee OA cohort. *Osteoarthritis and Cartilage*. 2011; 19: 647–654. doi: [10.1016/j.joca.2011.03.007](https://doi.org/10.1016/j.joca.2011.03.007) PMID: [21440077](https://pubmed.ncbi.nlm.nih.gov/21440077/)
19. Ohtori S, Orita S, Yamashita M, Ishikawa T, Ito T, Shigemura T, et al. Existence of a neuropathic pain component in patients with osteoarthritis of the knee. *Yonsei Med J*. 2012; 53: 801–805. doi: [10.3349/ymj.2012.53.4.801](https://doi.org/10.3349/ymj.2012.53.4.801) PMID: [22665349](https://pubmed.ncbi.nlm.nih.gov/22665349/)
20. Hochman JR, French MR, Birmingham SL, Hawker GA. The nerve of osteoarthritis pain. *Arthritis Care & Research*. 2010; 62: 1019–1023.
21. Bennett MI, Attal N, Backonja MM, Baron R, Bouhassira D, Freynhagen R, et al. Using screening tools to identify neuropathic pain. *Pain*. 2007; 127: 199–203. PMID: [17182186](https://pubmed.ncbi.nlm.nih.gov/17182186/)
22. Bennett MI, Smith BH, Torrance N, Lee AJ. Can pain can be more or less neuropathic? Comparison of symptom assessment tools with ratings of certainty by clinicians. *Pain*. 2006; 122: 289–294. PMID: [16540249](https://pubmed.ncbi.nlm.nih.gov/16540249/)
23. Cruccu G, Truini A. Tools for assessing neuropathic pain. *PLoS Med*. 2009; 6: e1000045. doi: [10.1371/journal.pmed.1000045](https://doi.org/10.1371/journal.pmed.1000045) PMID: [19360134](https://pubmed.ncbi.nlm.nih.gov/19360134/)
24. Mulvey MR, Bennett MI, Liwowsky I, Freynhagen R. The role of screening tools in diagnosing neuropathic pain. *Pain Manag*. 2014; 4: 233–243. doi: [10.2217/pmt.14.8](https://doi.org/10.2217/pmt.14.8) PMID: [24953075](https://pubmed.ncbi.nlm.nih.gov/24953075/)
25. Freynhagen R, Baron R, Gockel U, Tölle TR. Pain DETECT: a new screening questionnaire to identify neuropathic components in patients with back pain. *Current Medical Research and Opinion*. 2006; 22: 1911–1920. PMID: [17022849](https://pubmed.ncbi.nlm.nih.gov/17022849/)
26. Jones RC 3rd, Backonja MM. Review of neuropathic pain screening and assessment tools. *Curr Pain Headache Rep*. 2013; 17: 363-013-0363-6.
27. Beaton DE, Bombardier C, Guillemin F, Ferraz MB. Guidelines for the process of cross-cultural adaptation of self-report measures. *Spine*. 2000; 25: 3186–3191. PMID: [11124735](https://pubmed.ncbi.nlm.nih.gov/11124735/)
28. Terwee CB, Bot SD, de Boer MR, van der Windt DA, Knol DL, Dekker J, et al. Quality criteria were proposed for measurement properties of health status questionnaires. *J Clin Epidemiol*. 2007; 60: 34–42. PMID: [17161752](https://pubmed.ncbi.nlm.nih.gov/17161752/)
29. De Andrés Jose J, Lopez-Alarcon MD, Perez-Cajaraville J, Rodrigo-Royo MD, Margarit C, De Andres J, et al. Cultural adaptation and validation of the painDETECT scale into Spanish. *Clin J Pain*. 2012 Mar-Apr; 28: 243–53. doi: [10.1097/AJP.0b013e31822bb35b](https://doi.org/10.1097/AJP.0b013e31822bb35b) PMID: [21926908](https://pubmed.ncbi.nlm.nih.gov/21926908/)
30. Matsubayashi Yoshitaka Y, Okamoto N, Matsubayashi Y, Oshima Y, Takeshita K, Tonosu J, et al. Validity and reliability of the Japanese version of the painDETECT questionnaire: a multicenter observational study. *PLoS One*. 2013; 8.
31. de Vet Henrica C W HC, Bouter LM, Knol DL, de Vet HC, Terwee CB. When to use agreement versus reliability measures. *J Clin Epidemiol*. 2006–10; 59: 1033–9. PMID: [16980142](https://pubmed.ncbi.nlm.nih.gov/16980142/)
32. Bland J M JM, Bland JM, Altman DG. Statistical methods for assessing agreement between two methods of clinical measurement. *Lancet*. 1986-2-8; 1: 307–10.
33. Terwee CB, Mokkink LB, Knol DL, Ostelo RW, Bouter LM, de Vet HC. Rating the methodological quality in systematic reviews of studies on measurement properties: a scoring system for the COSMIN checklist. *Qual Life Res*. 2012; 21: 651–657. doi: [10.1007/s11136-011-9960-1](https://doi.org/10.1007/s11136-011-9960-1) PMID: [21732199](https://pubmed.ncbi.nlm.nih.gov/21732199/)
34. Alkan H, Ardic F, Erdogan C, Sahin F, Sarsan A, Findikoglu G. Turkish version of the painDETECT questionnaire in the assessment of neuropathic pain: a validity and reliability study. *Pain Med*. 2013; 14: 1933–1943. doi: [10.1111/pme.12222](https://doi.org/10.1111/pme.12222) PMID: [23924395](https://pubmed.ncbi.nlm.nih.gov/23924395/)

35. Deyo RA, Patrick DL, Diehr P. Reproducibility and responsiveness of health status measures. *Statistics and strategies for evaluation. Control Clin Trials.* 1991–8; 12.
36. De Vet HC, Terwee CB, Mokkink LB, Knol DL. *Measurement in medicine: a practical guide:* Cambridge University Press; 2011.
