# Supplementary material for: The Modified painDETECT Questionnaire for Patients with Hip or Knee Osteoarthritis: Translation into Dutch, Cross-Cultural Adaptation and Reliability Assessment
Source: PubMed Central journal article supplement (PMC4697818; doi:10.1371/journal.pone.0146117), 2015-12-31
Supplement: pone.0146117.s002.pdf [file pone.0146117.s002.pdf]

# Modified painDETECT

We hebben gemerkt dat mensen verschillende woorden gebruiken om verschillende soorten van pijn bij artrose te beschrijven.

Naast pijn beschrijven sommige mensen vervelende klachten zoals zeurende pijn, stijfheid en zelfs tintelingen rondom hun gewrichten. Vanaf nu gebruiken we simpelweg het woord “pijn” voor alle vervelende klachten.

Deze vragenlijst vraagt naar klachten van artrose van de heup. We zullen hier vragen naar klachten in **rust**, niet naar uw klachten tijdens lichamelijke activiteit.

De gegeven beschrijvingen kunnen, maar hoeven niet overeen te komen met uw “pijn”, ongeacht hoe ernstig deze is. Laat alstublieft geen enkele vraag onbeantwoord, zodat we zeker kunnen zijn over uw symptomen.

De vragenlijst is opgedeeld in 2 delen. Deel 1 vraagt naar uw RECHTER heup. Deel 2 vraagt naar uw LINKER heup.

---

## Deel 1: RECHTER HEUP

Denkt u alstublieft ALLEEN aan uw **RECHTER HEUP** wanneer u de volgende vragen beantwoordt.

1. Straalde de “pijn” van uw RECHTER heup **naar boven of naar beneden** uit over uw RECHTER been in de **AFGELOPEN WEEK?**

(Vink (✓) hieronder JA of NEE aan)

JA  → Zo “JA”, **markeer** alstublieft de “pijnlijke” gebieden van uw RECHTER heup op het hiernaast staande plaatje

NEE  → Als u “NEE” heeft aangevinkt, ga dan op de volgende bladzijde verder met Vraag 2.

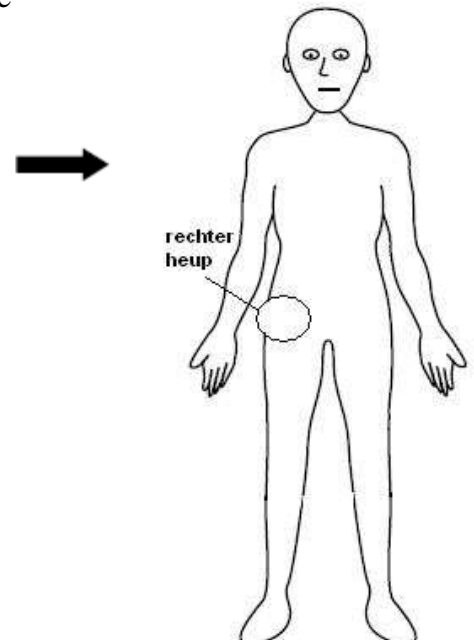



3. Aard van de “pijn” aan uw RECHTER heup in de **AFGELOPEN WEEK** (vervolg)

|                                                                                                                         | <b>Nooit</b>             | <b>Vrijwel<br/>niet</b>  | <b>Licht</b>             | <b>Matig</b>             | <b>Sterk</b>             | <b>Zeer<br/>Sterk</b>    |
|-------------------------------------------------------------------------------------------------------------------------|--------------------------|--------------------------|--------------------------|--------------------------|--------------------------|--------------------------|
| <b>c. Is een lichte aanraking (kleding, beddengoed) in dit gebied pijnlijk?</b>                                         | <input type="checkbox"/> | <input type="checkbox"/> | <input type="checkbox"/> | <input type="checkbox"/> | <input type="checkbox"/> | <input type="checkbox"/> |
| <b>d. Hebt u <u>schietende</u> pijnaanvallen in het pijnlijke gebied van uw RECHTER heup, als elektrische scheuten?</b> | <input type="checkbox"/> | <input type="checkbox"/> | <input type="checkbox"/> | <input type="checkbox"/> | <input type="checkbox"/> | <input type="checkbox"/> |
| <b>e. Is <u>kou of warmte</u> (badwater) in dit gebied wel eens pijnlijk?</b>                                           | <input type="checkbox"/> | <input type="checkbox"/> | <input type="checkbox"/> | <input type="checkbox"/> | <input type="checkbox"/> | <input type="checkbox"/> |
| <b>f. Hebt u last van een doof gevoel in of rondom uw RECHTER heup?</b>                                                 | <input type="checkbox"/> | <input type="checkbox"/> | <input type="checkbox"/> | <input type="checkbox"/> | <input type="checkbox"/> | <input type="checkbox"/> |
| <b>g. Wekt een lichte <u>druk</u>, bijvoorbeeld met de vinger, in dit gebied pijn op?</b>                               | <input type="checkbox"/> | <input type="checkbox"/> | <input type="checkbox"/> | <input type="checkbox"/> | <input type="checkbox"/> | <input type="checkbox"/> |

4. In de volgende paar vragen kunt u ons vertellen over de mate van ongemak die u ervaart in of rondom uw RECHTER heup

a. Welk cijfer geeft u op dit moment de pijn aan uw RECHTER heup op een 0-10 schaal. 0 staat voor ‘geen pijn’ en 10 is ‘de ergste pijn voorstelbaar’ (Omcirkel slechts EEN nummer)

**Geen ‘pijn’**

**Ergste ‘pijn’ voorstelbaar**

|   |   |   |   |   |   |   |   |   |   |    |
|---|---|---|---|---|---|---|---|---|---|----|
| 0 | 1 | 2 | 3 | 4 | 5 | 6 | 7 | 8 | 9 | 10 |
|---|---|---|---|---|---|---|---|---|---|----|

b. Hoe intens was de **HEFTIGSTE** ‘pijn’ in de **AFGELOPEN WEEK** aan uw RECHTER heup op een schaal van 0-10. 0 staat voor ‘geen pijn’ en 10 is ‘de ergste pijn voorstelbaar’ (Omcirkel slechts EEN nummer)

**Geen ‘pijn’**

**Ergste ‘pijn’ voorstelbaar**

|   |   |   |   |   |   |   |   |   |   |    |
|---|---|---|---|---|---|---|---|---|---|----|
| 0 | 1 | 2 | 3 | 4 | 5 | 6 | 7 | 8 | 9 | 10 |
|---|---|---|---|---|---|---|---|---|---|----|

- c. Hoe intens was **GEMIDDELD** de ‘pijn’ in de **AFGELOPEN WEEK** aan uw **RECHTER** heup op een schaal van 0-10. 0 staat voor ‘geen pijn’ en 10 is ‘de ergste pijn voorstelbaar’ (Omcirkel slechts EEN nummer)

Geen ‘pijn’

Ergste ‘pijn’ voorstelbaar

|   |   |   |   |   |   |   |   |   |   |    |
|---|---|---|---|---|---|---|---|---|---|----|
| 0 | 1 | 2 | 3 | 4 | 5 | 6 | 7 | 8 | 9 | 10 |
|---|---|---|---|---|---|---|---|---|---|----|

## Deel 2: LINKER HEUP

Denkt u alstublieft **ALLEEN** aan uw **LINKER HEUP** wanneer u de volgende vragen beantwoordt.

1. Straalde de “pijn” van uw **LINKER** heup **naar boven of naar beneden** uit over uw **LINKER** been in de **AFGELOPEN WEEK**?

(Vink (✓) hieronder JA of NEE aan)

JA  → Zo “JA”, **markeer** alstublieft de “pijnlijke” gebieden van uw **LINKER** heup op het hiernaast staande plaatje

NEE  → Als u “NEE” heeft aangevinkt, ga dan op de volgende bladzijde verder met Vraag 2.

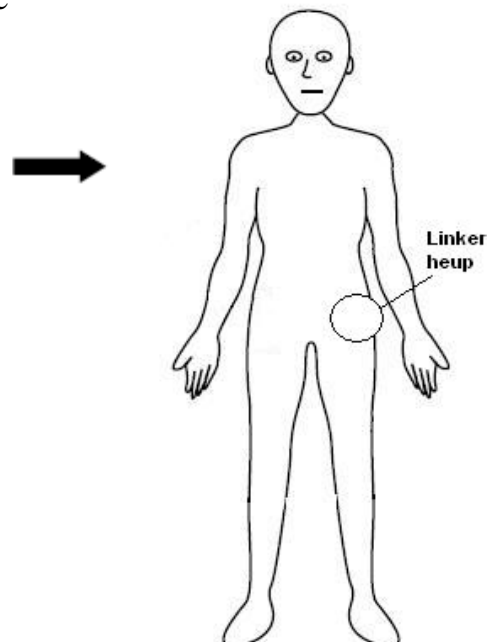



3. Aard van de “pijn” aan uw LINKER heup in de **AFGELOPEN WEEK** (vervolg)

|                                                                                                                        | <b>Nooit</b>             | <b>Vrijwel<br/>niet</b>  | <b>Licht</b>             | <b>Matig</b>             | <b>Sterk</b>             | <b>Zeer<br/>Sterk</b>    |
|------------------------------------------------------------------------------------------------------------------------|--------------------------|--------------------------|--------------------------|--------------------------|--------------------------|--------------------------|
| <b>c. Is een lichte aanraking (kleding, beddengoed) in dit gebied pijnlijk?</b>                                        | <input type="checkbox"/> | <input type="checkbox"/> | <input type="checkbox"/> | <input type="checkbox"/> | <input type="checkbox"/> | <input type="checkbox"/> |
| <b>d. Hebt u <u>schietende</u> pijnaanvallen in het pijnlijke gebied van uw LINKER heup, als elektrische scheuten?</b> | <input type="checkbox"/> | <input type="checkbox"/> | <input type="checkbox"/> | <input type="checkbox"/> | <input type="checkbox"/> | <input type="checkbox"/> |
| <b>e. Is <u>kou of warmte</u> (badwater) in dit gebied wel eens pijnlijk?</b>                                          | <input type="checkbox"/> | <input type="checkbox"/> | <input type="checkbox"/> | <input type="checkbox"/> | <input type="checkbox"/> | <input type="checkbox"/> |
| <b>f. Hebt u last van een doof gevoel in of rondom uw LINKER heup?</b>                                                 | <input type="checkbox"/> | <input type="checkbox"/> | <input type="checkbox"/> | <input type="checkbox"/> | <input type="checkbox"/> | <input type="checkbox"/> |
| <b>g. Wekt een lichte <u>druk</u>, bijvoorbeeld met de vinger, in dit gebied pijn op?</b>                              | <input type="checkbox"/> | <input type="checkbox"/> | <input type="checkbox"/> | <input type="checkbox"/> | <input type="checkbox"/> | <input type="checkbox"/> |

4. In de volgende paar vragen kunt u ons vertellen over de mate van ongemak die u ervaart in of rondom uw LINKER heup

- a. Welk cijfer geeft u op dit moment de pijn aan uw LINKER heup op een 0-10 schaal. 0 staat voor ‘geen pijn’ en 10 is ‘de ergste pijn voorstelbaar’ (Omcirkel slechts EEN nummer)

Geen ‘pijn’

Ergste ‘pijn’ voorstelbaar

|   |   |   |   |   |   |   |   |   |   |    |
|---|---|---|---|---|---|---|---|---|---|----|
| 0 | 1 | 2 | 3 | 4 | 5 | 6 | 7 | 8 | 9 | 10 |
|---|---|---|---|---|---|---|---|---|---|----|

- b. Hoe intens was de **HEFTIGSTE** ‘pijn’ in de **AFGELOPEN WEEK** aan uw LINKER heup op een schaal van 0-10. 0 staat voor ‘geen pijn’ en 10 is ‘de ergste pijn voorstelbaar’ (Omcirkel slechts EEN nummer)

Geen ‘pijn’

Ergste ‘pijn’ voorstelbaar

|   |   |   |   |   |   |   |   |   |   |    |
|---|---|---|---|---|---|---|---|---|---|----|
| 0 | 1 | 2 | 3 | 4 | 5 | 6 | 7 | 8 | 9 | 10 |
|---|---|---|---|---|---|---|---|---|---|----|

- c. Hoe intens was **GEMIDDELD** de 'pijn' in de **AFGELOPEN WEEK** aan uw **LINKER** heup op een schaal van 0-10. 0 staat voor 'geen pijn' en 10 is 'de ergste pijn voorstelbaar' (Omcirkel slechts EEN nummer)

**Geen 'pijn'**

**Ergste 'pijn' voorstelbaar**

|   |   |   |   |   |   |   |   |   |   |    |
|---|---|---|---|---|---|---|---|---|---|----|
| 0 | 1 | 2 | 3 | 4 | 5 | 6 | 7 | 8 | 9 | 10 |
|---|---|---|---|---|---|---|---|---|---|----|

## Modified painDETECT

We hebben gemerkt dat mensen verschillende woorden gebruiken om verschillende soorten van pijn bij artrose te beschrijven.

Naast pijn beschrijven sommige mensen vervelende klachten zoals zeurende pijn, stijfheid en zelfs tintelingen rondom hun gewrichten. Vanaf nu, gebruiken we simpelweg het woord “pijn” voor alle vervelende klachten.

Deze vragenlijst vraagt naar klachten van artrose van de knie. We zullen hier vragen naar klachten in rust, niet naar uw klachten tijdens lichamelijke activiteit.

De gegeven beschrijvingen kunnen, maar hoeven niet overeen te komen met uw “pijn”, ongeacht hoe ernstig deze is. Laat alstublieft geen enkele vraag onbeantwoord, zodat we zeker kunnen zijn over uw symptomen.

De vragenlijst is opgedeeld in 2 delen. Deel 1 vraagt naar uw RECHTER knie. Deel 2 vraagt naar uw LINKER knie.

---

### Deel 1: RECHTER KNIE

Denkt u alstublieft ALLEEN aan uw **RECHTER KNIE** wanneer u de volgende vragen beantwoordt.

1. Straalde de “pijn” van uw RECHTER knie **naar boven of naar beneden** uit over uw RECHTER been in de **AFGELOPEN WEEK?**

(Vink (✓) hieronder JA of NEE aan)

JA  → Zo “JA”, **markeer** alstublieft de “pijnlijke” gebieden van uw RECHTER been op het hiernaast staande plaatje

NEE  → Als u “NEE” heeft aangevinkt, ga dan op de volgende bladzijde verder met Vraag 2.

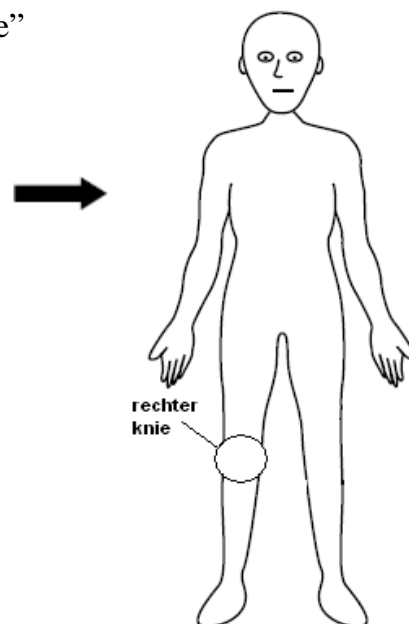





3. Aard van de “pijn” aan uw RECHTER knie in de **AFGELOPEN WEEK** (vervolg)

|                                                                                                                         | <b>Nooit</b>             | <b>Vrijwel<br/>niet</b>  | <b>Licht</b>             | <b>Matig</b>             | <b>Sterk</b>             | <b>Zeer<br/>Sterk</b>    |
|-------------------------------------------------------------------------------------------------------------------------|--------------------------|--------------------------|--------------------------|--------------------------|--------------------------|--------------------------|
| <b>c. Is een lichte aanraking (kleding, beddengoed) in dit gebied pijnlijk?</b>                                         | <input type="checkbox"/> | <input type="checkbox"/> | <input type="checkbox"/> | <input type="checkbox"/> | <input type="checkbox"/> | <input type="checkbox"/> |
| <b>d. Hebt u <u>schietende</u> pijnaanvallen in het pijnlijke gebied van uw RECHTER knie, als elektrische scheuten?</b> | <input type="checkbox"/> | <input type="checkbox"/> | <input type="checkbox"/> | <input type="checkbox"/> | <input type="checkbox"/> | <input type="checkbox"/> |
| <b>e. Is <u>kou of warmte</u> (badwater) in dit gebied wel eens pijnlijk?</b>                                           | <input type="checkbox"/> | <input type="checkbox"/> | <input type="checkbox"/> | <input type="checkbox"/> | <input type="checkbox"/> | <input type="checkbox"/> |
| <b>f. Hebt u last van een doof gevoel in of rondom uw RECHTER knie?</b>                                                 | <input type="checkbox"/> | <input type="checkbox"/> | <input type="checkbox"/> | <input type="checkbox"/> | <input type="checkbox"/> | <input type="checkbox"/> |
| <b>g. Wekt een lichte <u>druk</u>, bijvoorbeeld met de vinger, in dit gebied pijn op?</b>                               | <input type="checkbox"/> | <input type="checkbox"/> | <input type="checkbox"/> | <input type="checkbox"/> | <input type="checkbox"/> | <input type="checkbox"/> |

7. In de volgende paar vragen kunt u ons vertellen over de mate van ongemak die u ervaart in of rondom uw RECHTER knie

d. Welk cijfer geeft u op dit moment de pijn aan uw RECHTER knie op een 0-10 schaal. 0 staat voor ‘geen pijn’ en 10 is ‘de ergste pijn voorstelbaar’ (Omcirkel slechts EEN nummer)

**Geen ‘pijn’**

**Ergste ‘pijn’ voorstelbaar**

|   |   |   |   |   |   |   |   |   |   |    |
|---|---|---|---|---|---|---|---|---|---|----|
| 0 | 1 | 2 | 3 | 4 | 5 | 6 | 7 | 8 | 9 | 10 |
|---|---|---|---|---|---|---|---|---|---|----|

e. Hoe intens was de **HEFTIGSTE** ‘pijn’ in de **AFGELOPEN WEEK** aan uw RECHTER knie op een schaal van 0-10. 0 staat voor ‘geen pijn’ en 10 is ‘de ergste pijn voorstelbaar’ (Omcirkel slechts EEN nummer)

**Geen ‘pijn’**

**Ergste ‘pijn’ voorstelbaar**

|   |   |   |   |   |   |   |   |   |   |    |
|---|---|---|---|---|---|---|---|---|---|----|
| 0 | 1 | 2 | 3 | 4 | 5 | 6 | 7 | 8 | 9 | 10 |
|---|---|---|---|---|---|---|---|---|---|----|

- f. Hoe intens was **GEMIDDELD** de ‘pijn’ in de **AFGELOPEN WEEK** aan uw **RECHTER** knie op een schaal van 0-10. 0 staat voor ‘geen pijn’ en 10 is ‘de ergste pijn voorstelbaar’ (Omcirkel slechts EEN nummer)

Geen ‘pijn’

Ergste ‘pijn’ voorstelbaar

|   |   |   |   |   |   |   |   |   |   |    |
|---|---|---|---|---|---|---|---|---|---|----|
| 0 | 1 | 2 | 3 | 4 | 5 | 6 | 7 | 8 | 9 | 10 |
|---|---|---|---|---|---|---|---|---|---|----|

## Deel 2: LINKER KNIE

Denkt u alstublieft **ALLEEN** aan uw **LINKER KNIE** wanneer u de volgende vragen beantwoordt.

1. Straalde de “pijn” van uw **LINKER** knie **naar boven of naar beneden** uit over uw **LINKER** been in de **AFGELOPEN WEEK**?

(Vink (✓) hieronder JA of NEE aan)

JA  → Zo “JA”, **markeer** alstublieft de “pijnlijke” gebieden van uw **LINKER** been op het hiernaast staande plaatje

NEE  → Als u “NEE” heeft aangevinkt, ga dan op de volgende bladzijde verder met Vraag 2.

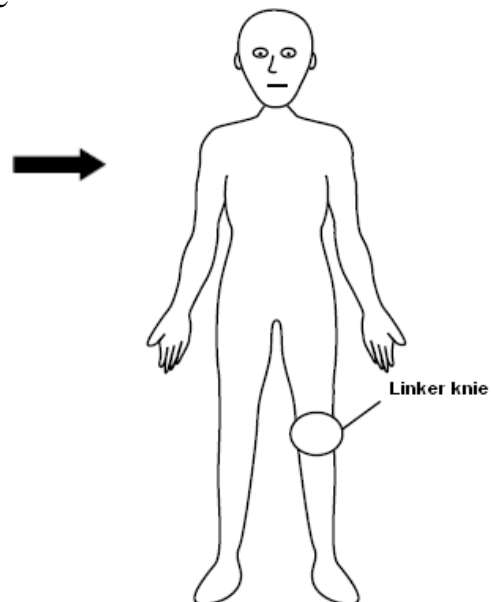



3. Aard van de “pijn” aan uw LINKER knie in de **AFGELOPEN WEEK** (vervolg)

|                                                                                                                        | <b>Nooit</b>             | <b>Vrijwel<br/>niet</b>  | <b>Licht</b>             | <b>Matig</b>             | <b>Sterk</b>             | <b>Zeer<br/>Sterk</b>    |
|------------------------------------------------------------------------------------------------------------------------|--------------------------|--------------------------|--------------------------|--------------------------|--------------------------|--------------------------|
| <b>c. Is een lichte aanraking (kleding, beddengoed) in dit gebied pijnlijk?</b>                                        | <input type="checkbox"/> | <input type="checkbox"/> | <input type="checkbox"/> | <input type="checkbox"/> | <input type="checkbox"/> | <input type="checkbox"/> |
| <b>d. Hebt u <u>schietende</u> pijnaanvallen in het pijnlijke gebied van uw LINKER knie, als elektrische scheuten?</b> | <input type="checkbox"/> | <input type="checkbox"/> | <input type="checkbox"/> | <input type="checkbox"/> | <input type="checkbox"/> | <input type="checkbox"/> |
| <b>e. Is <u>kou of warmte</u> (badwater) in dit gebied wel eens pijnlijk?</b>                                          | <input type="checkbox"/> | <input type="checkbox"/> | <input type="checkbox"/> | <input type="checkbox"/> | <input type="checkbox"/> | <input type="checkbox"/> |
| <b>f. Hebt u last van een doof gevoel in of rondom uw LINKER knie?</b>                                                 | <input type="checkbox"/> | <input type="checkbox"/> | <input type="checkbox"/> | <input type="checkbox"/> | <input type="checkbox"/> | <input type="checkbox"/> |
| <b>g. Wekt een lichte <u>druk</u>, bijvoorbeeld met de vinger, in dit gebied pijn op?</b>                              | <input type="checkbox"/> | <input type="checkbox"/> | <input type="checkbox"/> | <input type="checkbox"/> | <input type="checkbox"/> | <input type="checkbox"/> |

4. In de volgende paar vragen kunt u ons vertellen over de mate van ongemak die u ervaart in of rondom uw LINKER knie

d. Welk cijfer geeft u op dit moment de pijn aan uw LINKER knie op een 0-10 schaal. 0 staat voor ‘geen pijn’ en 10 is ‘de ergste pijn voorstelbaar’ (Omcirkel slechts EEN nummer)

**Geen ‘pijn’**

**Ergste ‘pijn’ voorstelbaar**

|   |   |   |   |   |   |   |   |   |   |    |
|---|---|---|---|---|---|---|---|---|---|----|
| 0 | 1 | 2 | 3 | 4 | 5 | 6 | 7 | 8 | 9 | 10 |
|---|---|---|---|---|---|---|---|---|---|----|

e. Hoe intens was de **HEFTIGSTE** ‘pijn’ in de **AFGELOPEN WEEK** aan uw LINKER knie op een schaal van 0-10. 0 staat voor ‘geen pijn’ en 10 is ‘de ergste pijn voorstelbaar’ (Omcirkel slechts EEN nummer)

**Geen ‘pijn’**

**Ergste ‘pijn’ voorstelbaar**

|   |   |   |   |   |   |   |   |   |   |    |
|---|---|---|---|---|---|---|---|---|---|----|
| 0 | 1 | 2 | 3 | 4 | 5 | 6 | 7 | 8 | 9 | 10 |
|---|---|---|---|---|---|---|---|---|---|----|

- f. Hoe intens was **GEMIDDELD** de 'pijn' in de **AFGELOPEN WEEK** aan uw **LINKER** knie op een schaal van 0-10. 0 staat voor 'geen pijn' en 10 is 'de ergste pijn voorstelbaar' (Omcirkel slechts EEN nummer)

**Geen 'pijn'**

**Ergste 'pijn' voorstelbaar**

|   |   |   |   |   |   |   |   |   |   |    |
|---|---|---|---|---|---|---|---|---|---|----|
| 0 | 1 | 2 | 3 | 4 | 5 | 6 | 7 | 8 | 9 | 10 |
|---|---|---|---|---|---|---|---|---|---|----|
